# Supplementary material for: Sub-diagnostic effects of genetic variants associated with autism
Source: bioRxiv or medRxiv preprint supplement (doi:10.1101/2021.02.12.21251621), 2022-04-11

Extended Data Figure 1

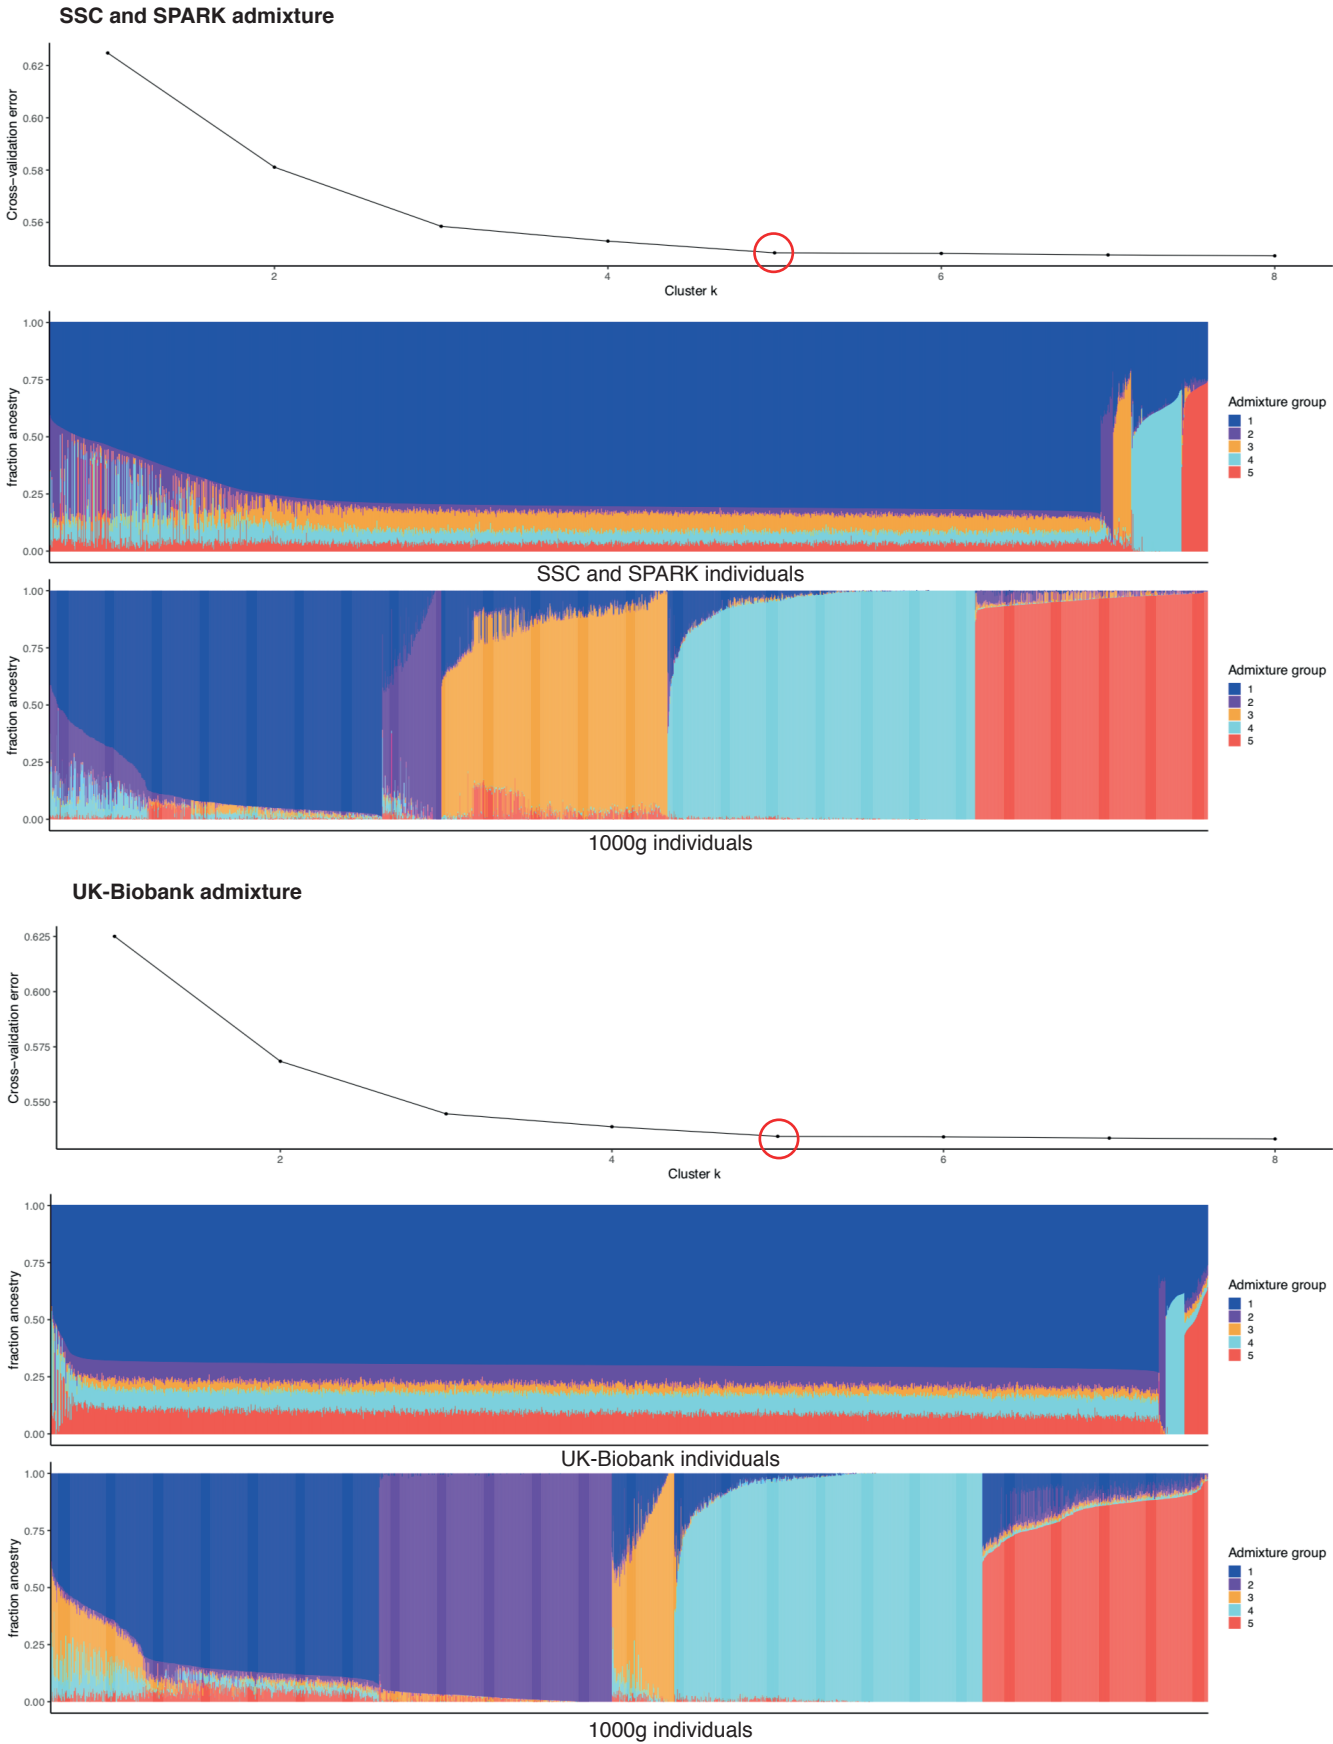

Supplement: Supplementary file [file media-1.pdf]
